# Supplementary material for: In Vivo Correction of COX Deficiency by Activation of the AMPK/PGC-1α Axis
Source: PubMed Central journal article supplement — Cell Metab. 2011 Jul 6;14(1):80–90. doi: 10.1016/j.cmet.2011.04.011 (PMC3130927; doi:10.1016/j.cmet.2011.04.011), 2011-07-06
Supplement: mmc1.pdf [file mmc1.pdf]

## **Supplemental Information**

### **In Vivo Correction of COX Deficiency by Activation of the AMPK/PGC-1 $\alpha$ Axis**

**Carlo Viscomi, Emanuela Bottani, Gabriele Civiletto, Raffaele Cerutti, Maurizio Moggio,  
Gigliola Fagiolari, Eric A. Schon, Costanza Lamperti, and Massimo Zeviani**

#### **Inventory of Supplemental Information**

Tables S1–S4 summarize the results of biochemical assays of the respiratory chain complexes I-IV and citrate synthase.

Figure S1 and legend report some of the effects of bezafibrate treatment of *Surf1*<sup>-/-</sup> and control littermates.

Figure S2 and legend report the strategy for the construction of a *Cox15* conditional knockout allele and the corresponding genotyping diagnosis in recombinant mice.

Figure S3 and legend report the effects of bezafibrate treatment in skeletal muscle of *ACTA-Cox15*<sup>-/-</sup> mice.

**Table S1.** Specific activities of citrate synthase (CS) and MRC complexes (CI-IV) in ACTA-Cox15<sup>-/-</sup> mice (n.3) and COX15<sup>lox/lox</sup> (n.3), considered as WT. Values are expressed as nanomoles/min/mg protein

|                      | <b>CS</b>   | <b>CI</b>  | <b>CII*</b> | <b>CIII</b> | <b>CIV***</b> |
|----------------------|-------------|------------|-------------|-------------|---------------|
| CTR                  | 354.7±103.5 | 186.0±77.4 | 24.2±4.2    | 283.3±26.4  | 347.0±97.1    |
| Cox15 <sup>-/-</sup> | 487.3±84.9  | 248.0±77.8 | 35.0±7.8    | 314.7±41    | 30.7±9.2      |

\* Student's *t* test p<0.05

\*\*\* Student's *t* test p<0.005

**Table S2.** Specific activities of MRC complexes CI-IV and citrate synthase (CS) of Surf1<sup>-/-</sup> and WT littermates. Values are expressed as nanomoles/min/mg protein

|                             | <b>CS</b>   | <b>CI</b>   | <b>CII</b> | <b>CIII</b> | <b>CIV</b>   |
|-----------------------------|-------------|-------------|------------|-------------|--------------|
| WT                          | 363.3±39.2  | 163.3±39.7  | 37.9±11.5  | 339.9±15.5  | 382.5±45.2   |
| WT AICAR                    | 418.8±124.0 | 127.5±50.2  | 56.9±14.3  | 362.6±127.2 | 514.3±80.5*  |
| Surf1 <sup>-/-</sup>        | 310.8±66.8  | 96.2±21.2   | 34.2±13.7  | 249.7±44.3  | 100.6±7.8    |
| Surf1 <sup>-/-</sup> +AICAR | 336.4±52.3  | 144.6±18.1* | 46.1±4.4** | 352.6±45.8* | 161.0±3.5*** |

Student's *t* test \*p<0.05;  
\*\*p<0.01; \*\*\*p<0.001

**Table S3.** Specific activities of MRC complexes CI-IV and citrate synthase (CS) of Sco2<sup>KOKI</sup> and WT littermates. Values are expressed as nanomoles/min/mg protein

|                            | <b>CS</b>   | <b>CI</b>   | <b>CII</b> | <b>CIII</b> | <b>CIV</b>   |
|----------------------------|-------------|-------------|------------|-------------|--------------|
| WT                         | 289.0±104.0 | 136.3±77.3  | 24.9±2.6   | 517.3±17.5  | 332.8±48.2   |
| WT+AICAR                   | 349.0±115.1 | 156.5±47.2  | 32.3±6.7   | 598.6±24.2* | 350.3±36.0   |
| Sco2 <sup>KOKI</sup>       | 408.0±55.4  | 88.2±16.2   | 34.7±13.7  | 206.0±41.3  | 172.6±49.8   |
| Sco2 <sup>KOKI</sup> AICAR | 546.2±123.2 | 134.6±26.1* | 57.1±5.6*  | 374.6±85.8* | 247.0±39.5** |

Student's *t* test \*p<0.05;  
\*\*p<0.01

**Table S4.** Specific activities of MRC complexes CI-IV and citrate synthase (CS) of ACTA-Cox15<sup>-/-</sup> and WT littermates. Values are expressed as nanomoles/min/mg protein

|                             | <b>CS</b>   | <b>CI</b>  | <b>CII</b> | <b>CIII</b>  | <b>CIV</b>    |
|-----------------------------|-------------|------------|------------|--------------|---------------|
| WT                          | 341.2±104.6 | 186.1±77.3 | 24.2±4.2   | 283.1±26.7   | 347.2±97.2    |
| WT AICAR                    | 349.2±115.3 | 156.6±47.5 | 32.3±6.7   | 471.4±27.3** | 768.2±17.2**  |
| Cox15 <sup>-/-</sup>        | 487.3±85.1  | 248.0±78.1 | 34.9±7.8   | 315.3±41.2   | 30.7±9.0      |
| Cox15 <sup>-/-</sup> +AICAR | 661.1±9.1   | 237.6±10.2 | 46.0±17.6* | 549.3±86.1** | 127.5±15.4*** |

Student's *t* test \*p<0.05; \*\*p<0.01; \*\*\*p<0.001

Figure S1

Bezafibrate treatment in *Surf1*<sup>-/-</sup> mice.

A: body weight during treatment. Red lines: *Surf1*<sup>-/-</sup> mice (n. 3). Blue lines: WT littermates (n. 3). Continuous lines: untreated animals. Dotted lines: treated animals (see main text for details).

B: liver enlargement at autopsy of a treated vs. an untreated *Surf1*<sup>-/-</sup> mice.

C: liver weight/body weight in untreated (Unt) vs. treated (bzf) animals (n. 3 for each group).

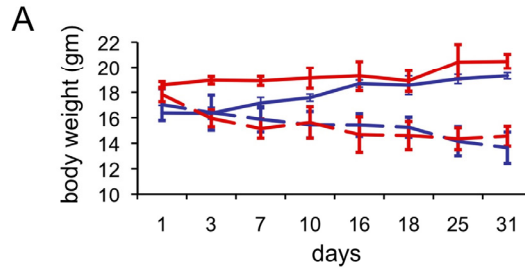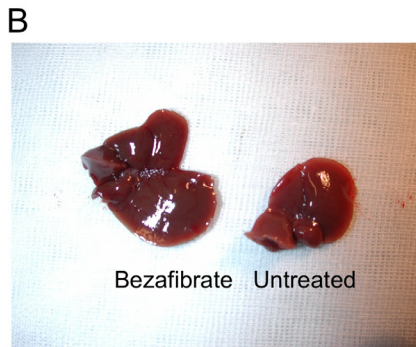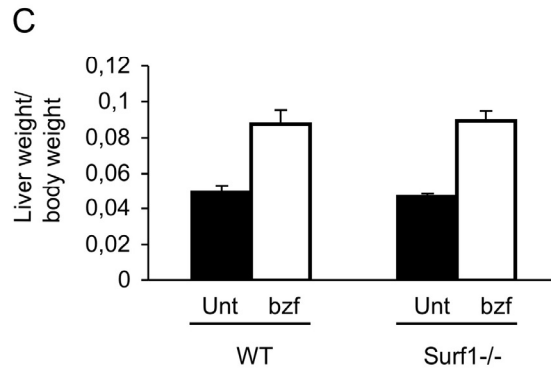

Figure S2  
 Cox15<sup>lox</sup> and ACTA-Cox15<sup>-/-</sup> recombinant alleles

- A. Schematic structure of wild type (WT) and recombinant Cox15<sup>lox</sup> allele. Short and long arm of homology are shown in blue. A neomycin-resistance cassette is shown in yellow. Two lox-P sites are located in introns flanking exons 1 and 2. Arrowheads indicate the position of primers used specific to the short arm (SA1/F and Neo/R) and the long arm (Neo/F and LA1/R) for the screening of recombinant ES cells. Note that both SA1/F and LA1/R are located in regions outside the recombinant construct. Primer sequences are available on request.
- B. PCR-based screening of positive ES clones using the primer pairs SA1/F and Neo/R (left panel) specific for the short arm, and Neo/F and LA1/R (right panel) specific for the long arm. Clone 4 shows the expected fragments at 3.2kb (short arm) and 9.8 kb (long arm). Positive (+) and negative (-) controls are shown, as well as four non-recombinant clones (1, 2, 3, 5).
- C. Left: schematic structure of the recombinant Cox15<sup>lox</sup> allele before (top) and after (bottom) cre-mediated recombination of the region encompassed by the two lox-P sites. Arrowheads indicate the position of the primer pairs Cox15lox/F and Cox15lox/R used for the genotype analysis. Right: PCR-based genotyping in muscle (M), heart (H), liver (L) and brain (B) of Cox15<sup>lox/lox</sup> vs ACTA-Cox15<sup>-/-</sup> alleles of two recombinant animals. Note that the diagnostic band specific to the ACTA-Cox15<sup>-/-</sup> allele is present only in skeletal muscle and, in trace amount, in the heart.

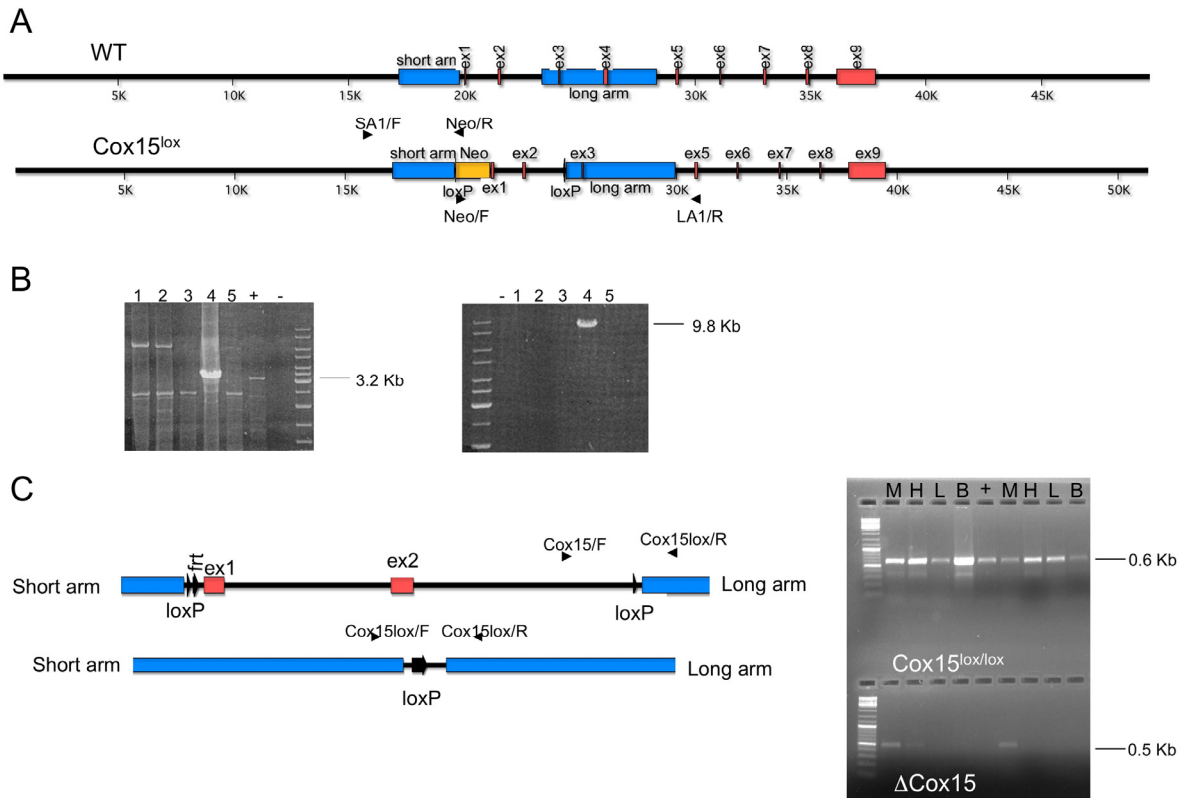

Figure S3  
Effects of bezafibrate of *ACTA-Cox15<sup>-/-</sup>* mice

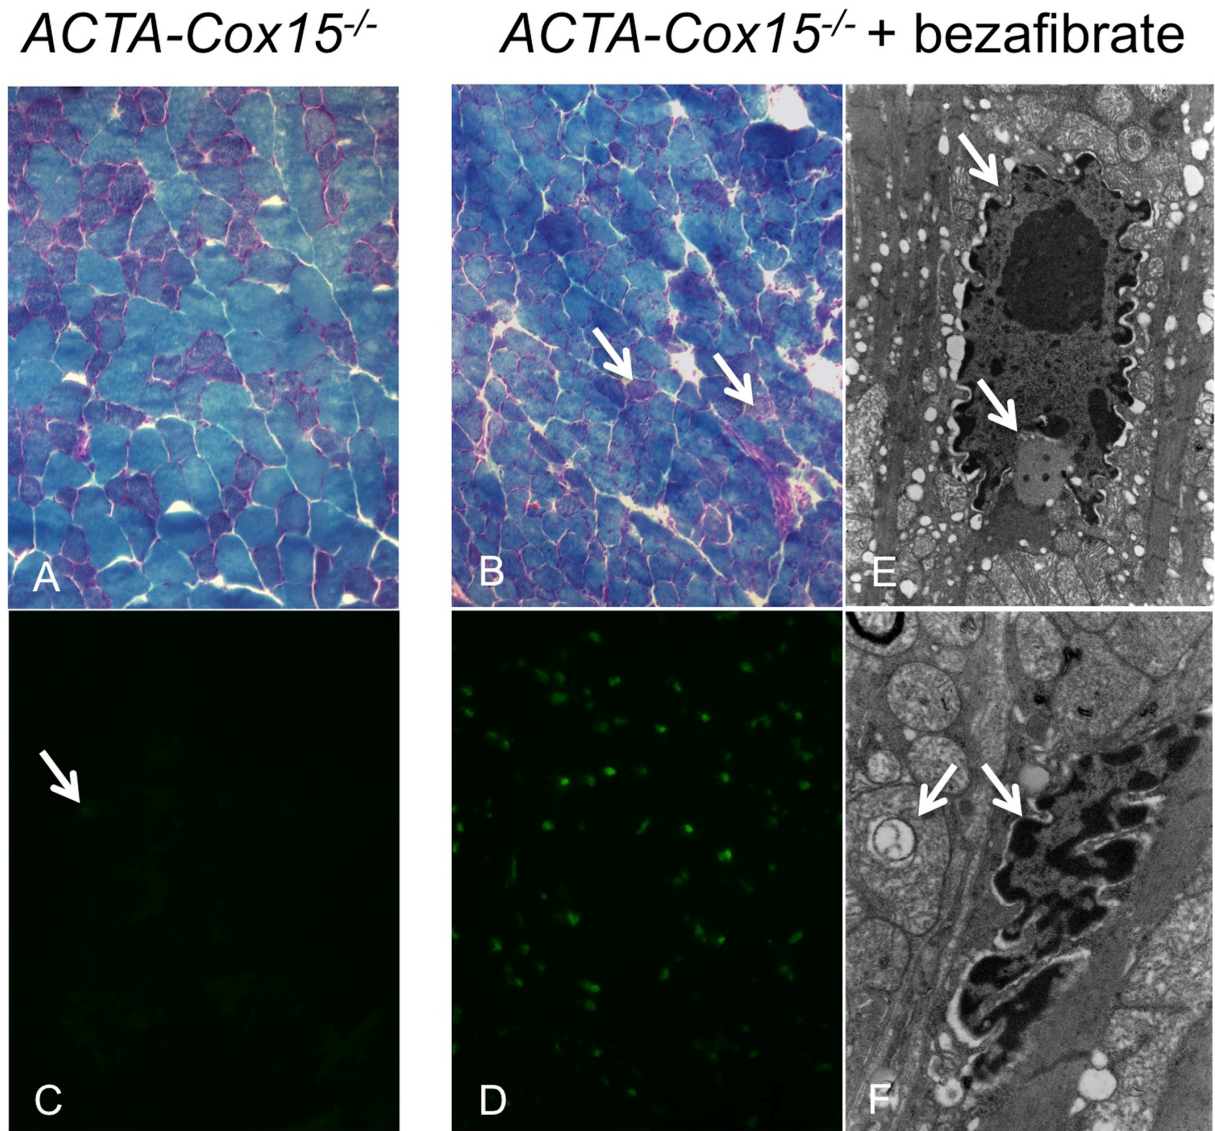

Gomori trichrome staining of muscle from A) an *ACTA-Cox15<sup>-/-</sup>* untreated mouse (*panel A*) and bezafibrate-treated *ACTA-Cox15<sup>-/-</sup>* mouse (*panel B*). Note the increase of ragged-red fibers, fiber-size variation and central nuclei in the bezafibrate-treated muscle. Arrows indicate two degenerated fibers. Magnification 20x.

TUNEL staining in sections serial to those shown in *panels A* and *B*. The bezafibrate-treated muscle (*panel D*) contains numerous TUNEL-positive fluorescent green nuclei, compared to a single weakly TUNEL-positive nucleus present in untreated muscle, indicated by an arrow (*panel C*).

*Panel E*: Electron microscopy (EM) of a nucleus in a muscle fiber from a bezafibrate-treated *ACTA-Cox15<sup>-/-</sup>* mouse. Note the gaps in the nuclear membrane and an apoptotic body (arrows). Magnification 20000x.

*Panel F*: EM of a piknotic nucleus and a vacuolated mitochondrion (arrows) in a muscle fiber from a bezafibrate-treated *ACTA-Cox15<sup>-/-</sup>* mouse. Magnification 20000x.
